# Supplementary material for: Integrative Molecular Analyses of the MD Anderson Prostate Cancer Patient-derived Xenograft (MDA PCa PDX) Series
Source: PubMed Central journal article supplement — Clin Cancer Res. 2024 Mar 15;30(10):2272–85. doi: 10.1158/1078-0432.CCR-23-2438 (PMC11094415; doi:10.1158/1078-0432.ccr-23-2438), 2024-03-15
Supplement: ccr-23-2438_supplementary_figure_s1_suppfs1.pdf [file ccr-23-2438_supplementary_figure_s1_suppfs1.pdf]

Figure S1

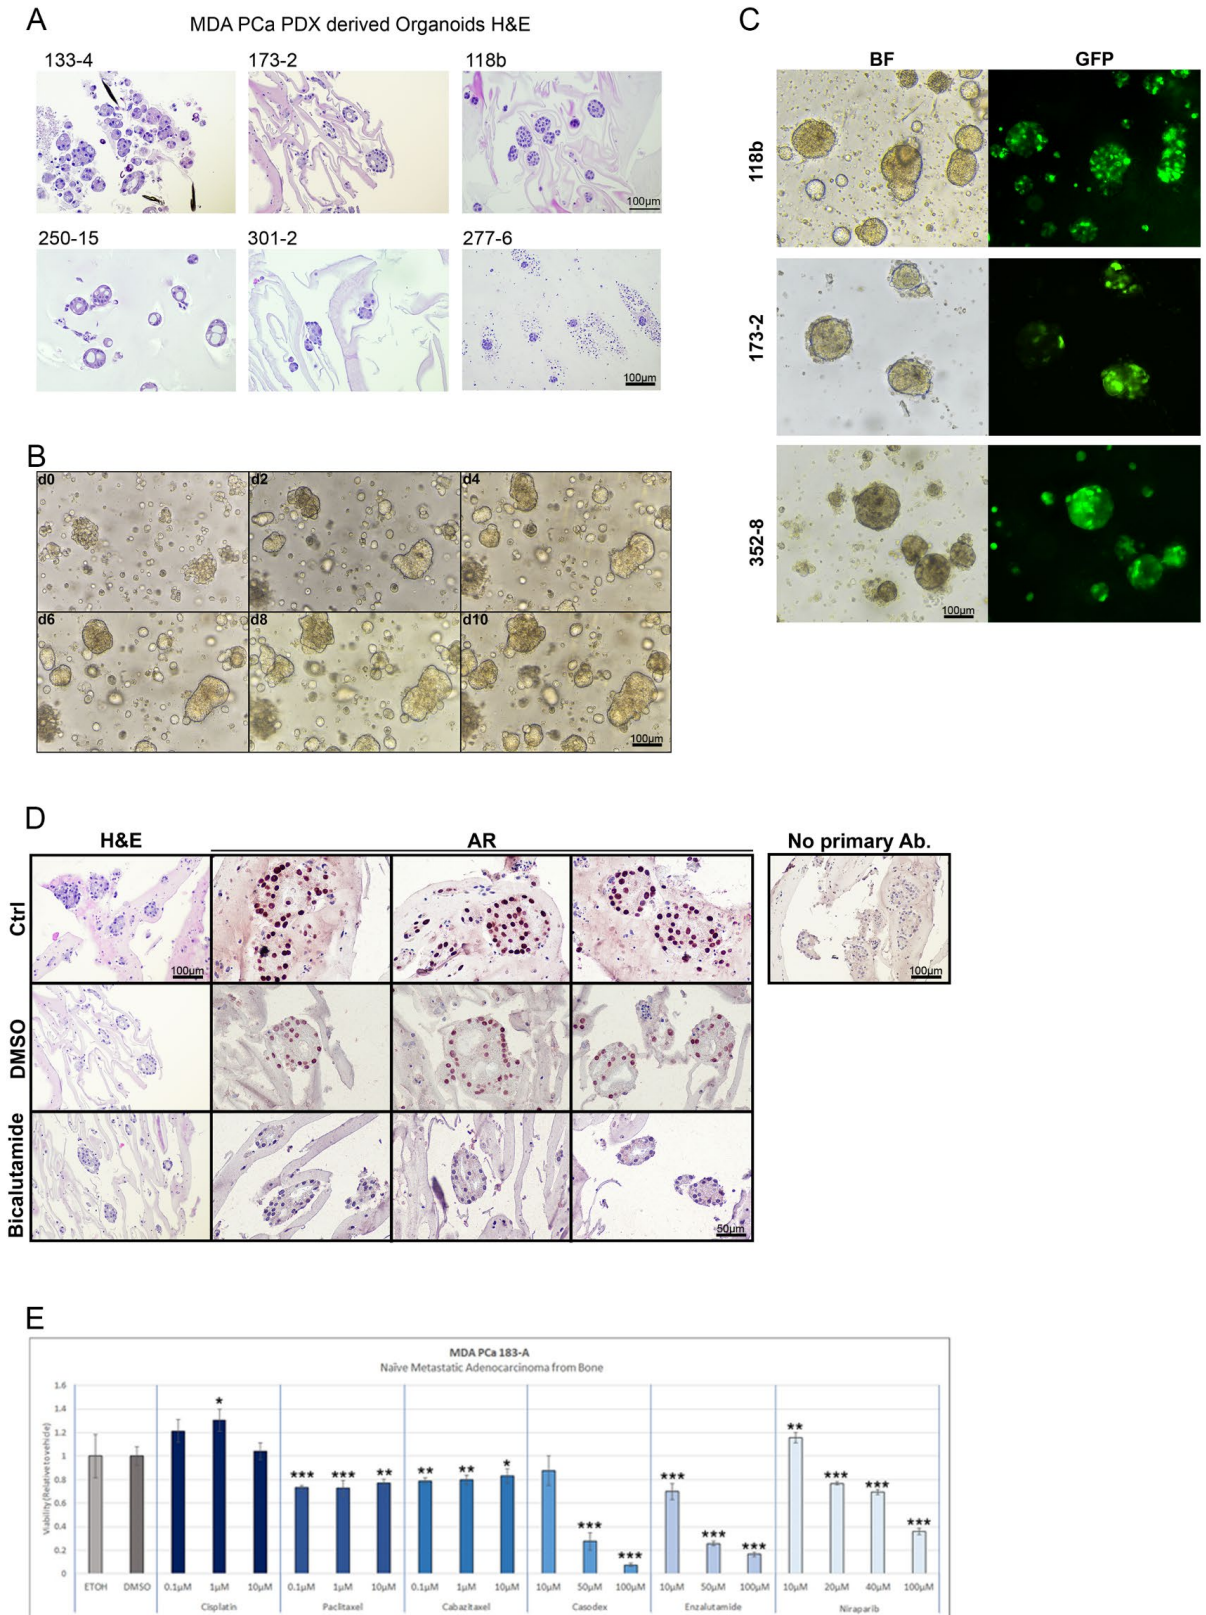

**Fig S1. MDA PCa PDX-derived organoids.** **A.** Representative H&E images of organoids derived from MDA PCa PDX. **B.** Representative bright field images monitoring organoids derived from MDA PCa 250-15 growth overtime (days 0, 2, 4, 6, 8, 10). **C.** Bright field (BF) and fluorescence images of PDX-derived organoids (118b, 173-2, 352-8) genetically engineered to express Green Fluorescent Protein (GFP). **D.** H&E and AR expression by IHC in MDA PCa 173-2 treated with vehicle (DMSO) or antiandrogen Bicalutamide 100 mM at 48 hours, or untreated (Ctrl). **E.** Cell viability assay of MDA PCa 183-A organoids treated with a range of doses of Cisplatin, Paclitaxel, Cabazitaxel, Bicalutamide (Casodex), Enzalutamide, Niraparib for 96 hours. \*  $P < 0.05$ ; \*\*  $P < 0.01$ ; \*\*\*  $P < 0.001$ . ETOH: ethanol; DMSO: dimethyl sulfoxide.
