# Supplementary material for: Integrative Molecular Analyses of the MD Anderson Prostate Cancer Patient-derived Xenograft (MDA PCa PDX) Series
Source: PubMed Central journal article supplement — Clin Cancer Res. 2024 Mar 15;30(10):2272–85. doi: 10.1158/1078-0432.CCR-23-2438 (PMC11094415; doi:10.1158/1078-0432.ccr-23-2438), 2024-03-15
Supplement: ccr-23-2438_supplementary_figure_s2_suppfs2.pdf [file ccr-23-2438_supplementary_figure_s2_suppfs2.pdf]

Figure S2

A

Chromosome gains and losses in MDA PCa PDX

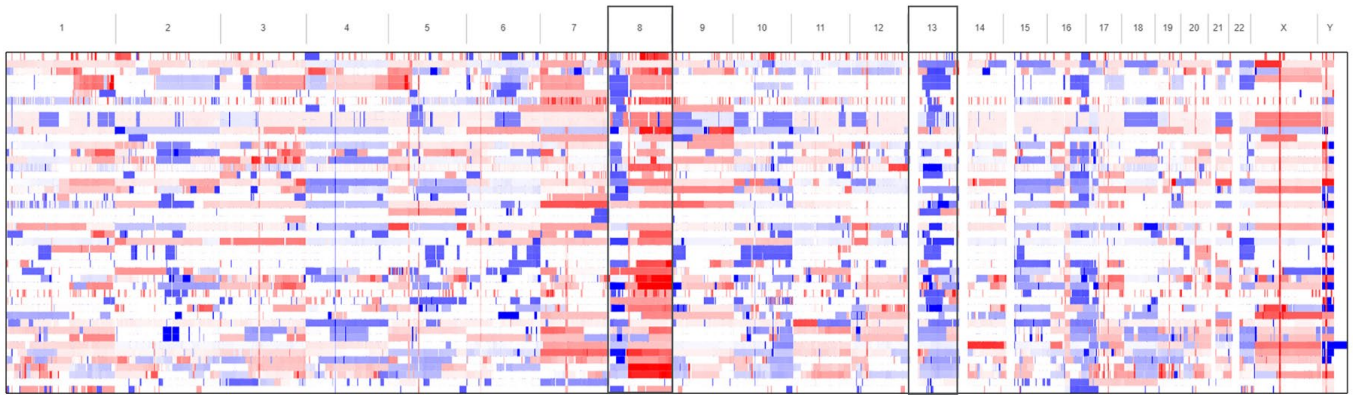

B

PTEN and RB1 CNV and mRNA levels in MDA PCa PDXs

|         | PTEN    | RB1     |
|---------|---------|---------|
| 117-9   | Gain    |         |
| 133-4   |         |         |
| 146-12  | DeepDel |         |
| 152-1   | DeepDel |         |
| 153-7   | DeepDel |         |
| 163-A   |         |         |
| 173-2   |         |         |
| 174-6   |         |         |
| 175-6   |         |         |
| 178-11  | DeepDel |         |
| 180-30  |         |         |
| 183-A   |         |         |
| 200-0   |         | *       |
| 203-A   | DeepDel |         |
| 250-15  | DeepDel | ShalDel |
| 265-8   |         |         |
| 266-A   |         | *       |
| 270-A   |         |         |
| 274-2   |         |         |
| 280-9   |         |         |
| 285-3*  |         |         |
| 306-14* |         |         |
| 316-1   |         |         |
| 316-2   |         |         |
| 320-1   |         |         |
| 322-2   |         |         |
| 327-2   |         |         |
| 352-8*  |         |         |
| 377-1   |         |         |
| 118b    |         |         |
| 177-8*  |         |         |
| 315-8*  |         |         |
| 144-4   |         |         |
| 144-13  |         |         |
| 146-10  |         |         |
| 150-7   |         |         |
| 155-2   |         |         |
| 273-A   |         |         |
| 277-6   |         |         |
| 312-7   |         |         |
| 328-5   |         |         |
| 337-A   |         |         |
| 342-8   |         |         |
| 355-9   |         | *       |
| 274-2   | DeepDel |         |
| 280-9   |         |         |
| 285-3   |         |         |
| 306-14  |         |         |
| 316-1   |         |         |
| 316-2   |         |         |
| 320-1   |         |         |
| 322-2   |         |         |
| 327-2   |         |         |
| 352-8   |         |         |
| 377-1   |         |         |
| 118b    |         |         |
| 177-8   |         |         |
| 315-8   |         |         |
| 144-4   |         |         |
| 144-13  |         |         |
| 146-10  |         |         |
| 150-7   |         |         |
| 155-2   |         |         |
| 273-A   |         |         |
| 277-6   |         |         |
| 312-7   |         |         |
| 328-5   |         |         |
| 337-A   |         |         |
| 342-8   |         |         |
| 355-9   |         | *       |

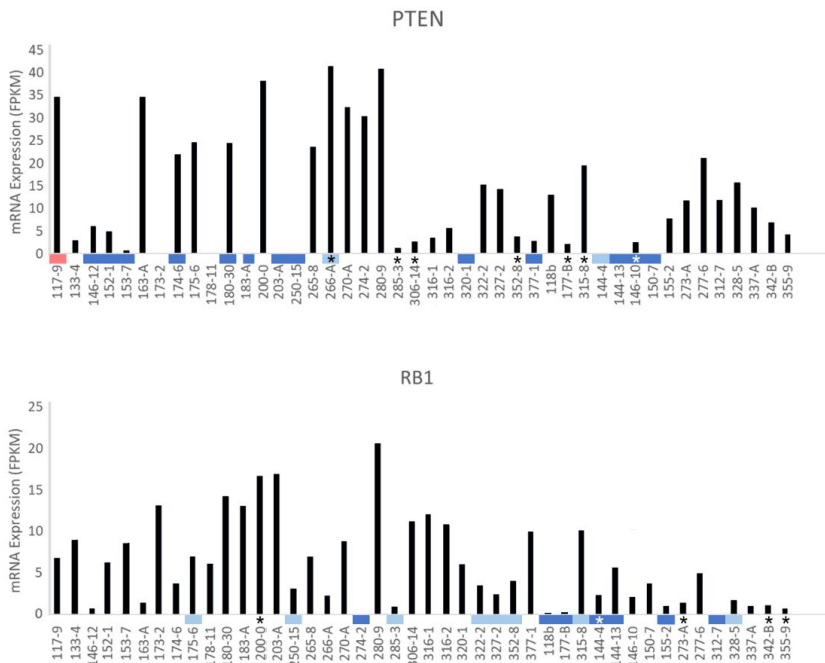

**Fig S2. General copy number profile and association with expression for PTEN and RB1. A. Segmented copy number data obtained from whole genome sequencing.** Chromosomal gains and losses in all chromosomes of all 44 MDA PCa PDX. Segment gains and losses are depicted in red or blue, respectively. **B. Correlation of copy number variation (CNV) with RNA expression of PTEN and RB1 in MDA PCa PDX cohort.** CNV of Phosphatase And Tensin Homolog (PTEN) and Retinoblastoma 1 (RB1), based on whole genome sequencing (WGS) data (left) and RNA expression levels (right). \* indicates full or partial copy number/ transcript loss determined by manual inspection. FPKM: fragments per kilobase of transcript per million mapped reads.
