# Supplementary material for: Integrative Molecular Analyses of the MD Anderson Prostate Cancer Patient-derived Xenograft (MDA PCa PDX) Series
Source: PubMed Central journal article supplement — Clin Cancer Res. 2024 Mar 15;30(10):2272–85. doi: 10.1158/1078-0432.CCR-23-2438 (PMC11094415; doi:10.1158/1078-0432.ccr-23-2438), 2024-03-15
Supplement: ccr-23-2438_supplementary_figure_s3_suppfs3.pdf [file ccr-23-2438_supplementary_figure_s3_suppfs3.pdf]

Figure S3

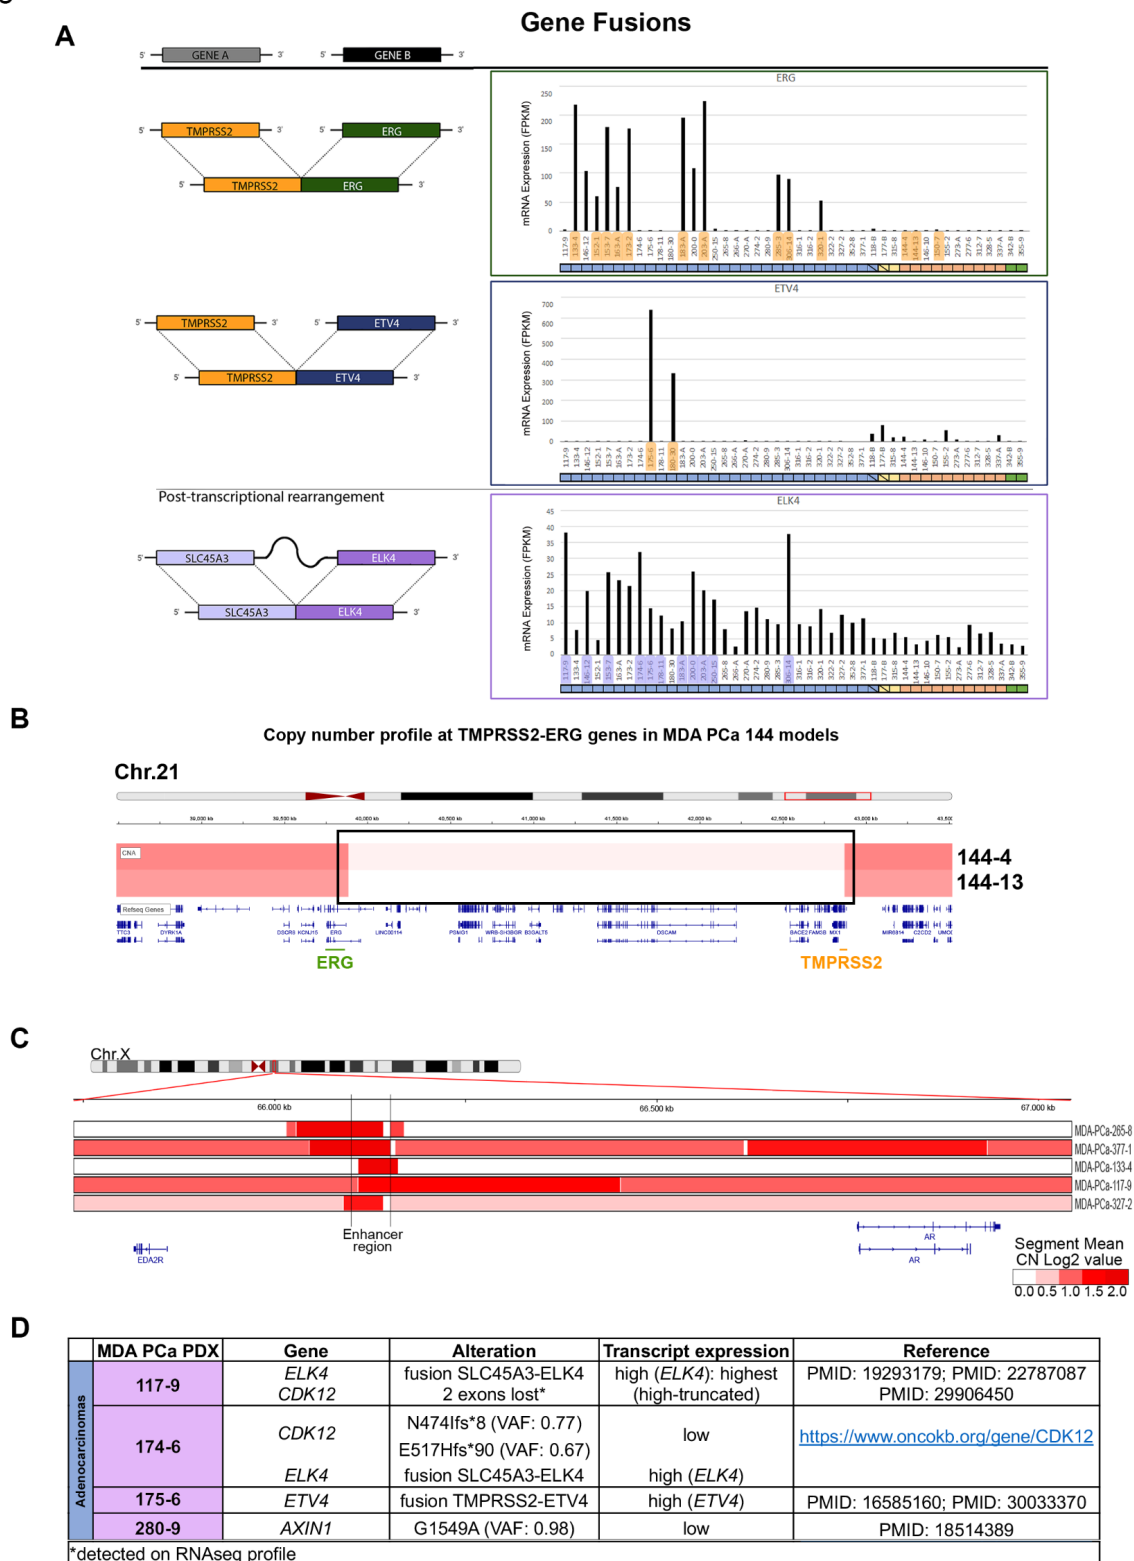

**Fig S3. Fusion genes expression levels. CNV details on *TMPRSS2-ERG* fusion and AR enhancer region. Putative PCa drivers in models lacking alterations in four major genes. A.** Representation of fusions identified (left) associated with high RNA expression levels of gene B (right) in the MDA PCa PDX cohort studied. Models in which fusions were detected are highlighted in orange for *TMPRSS2* and in light violet for *SLC45A3*. *TMPRSS2*: transmembrane serine protease 2; *ERG*: ETS-related gene; *ETV4*: ETS variant transcription factor 4; *ELK4*: ETS transcription factor *ELK4*; *SLC45A3*: solute carrier family 45 member 3; FPKM: fragments per kilobase of transcript per million mapped reads. **B.** Detailed copy number profile in Chromosome 21 for MDA PCa 144-4 and 144-13 models derived from two areas of the same tumor, depicting region containing *TMPRSS2* and *ERG* genes. **C.** Detail of segment Copy Number (CN) Log2 value in the region containing AR and its enhancer, for models with amplified enhancer region. **D.** Putative PCa drivers in models lacking alterations in four major genes. Note that only some of the oncogenic alterations found in these models are presented in the table.
