# Supplementary material for: Integrative Molecular Analyses of the MD Anderson Prostate Cancer Patient-derived Xenograft (MDA PCa PDX) Series
Source: PubMed Central journal article supplement — Clin Cancer Res. 2024 Mar 15;30(10):2272–85. doi: 10.1158/1078-0432.CCR-23-2438 (PMC11094415; doi:10.1158/1078-0432.ccr-23-2438), 2024-03-15
Supplement: ccr-23-2438_supplementary_figure_s4_suppfs4.pdf [file ccr-23-2438_supplementary_figure_s4_suppfs4.pdf]

Figure S4

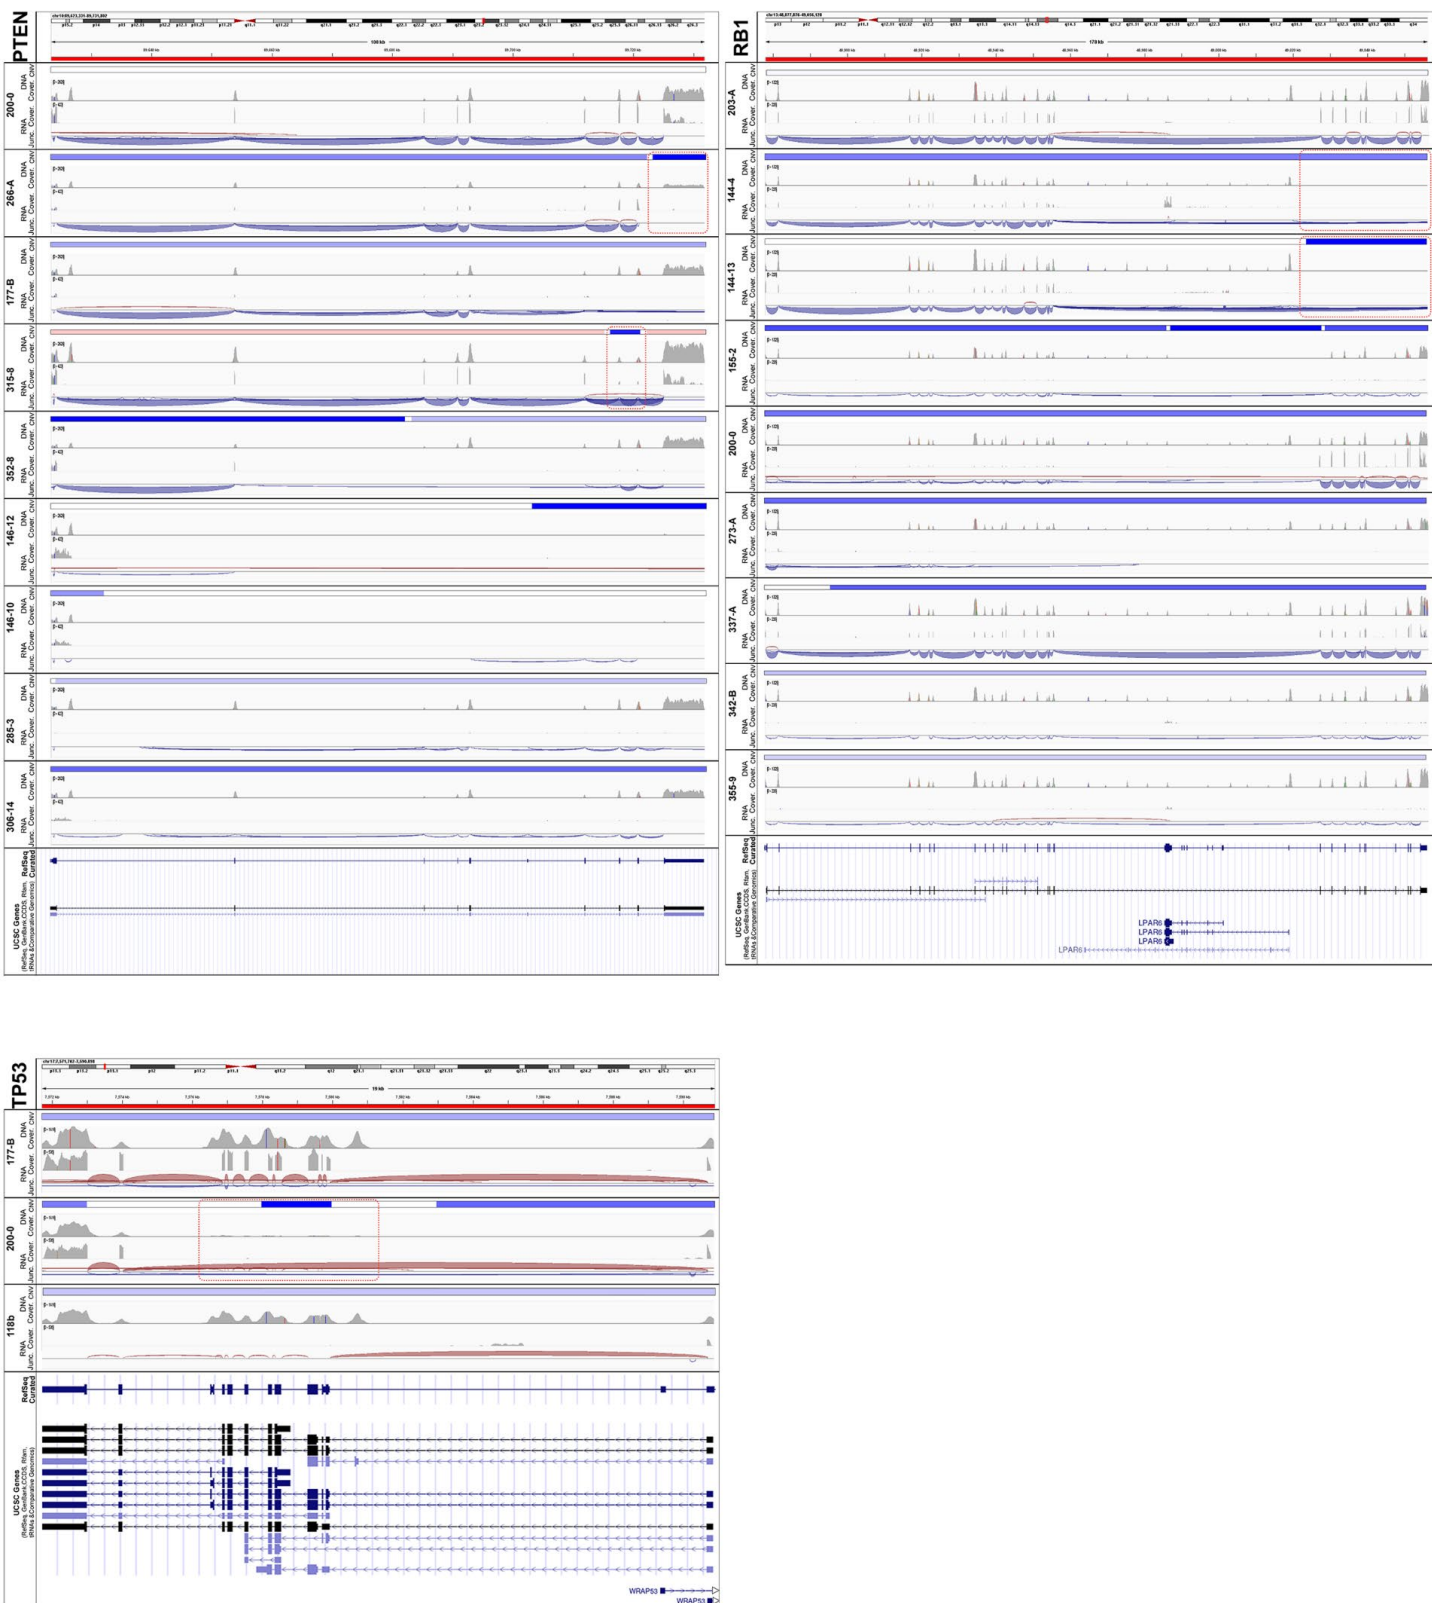

**Fig S4. Detail of manually curated full or partial copy number/ transcript loss.** Analysis was done for Phosphatase And Tensin Homolog (PTEN) and Retinoblastoma 1 (RB1) and Tumor Protein 53 (TP53) genes. DNA coverage (reads) and CNV, and RNA coverage (reads) and junctions are shown. Dotted red squares depict specific regions with null or reduced read at both DNA and RNA level.
