# Supplementary material for: Integrative Molecular Analyses of the MD Anderson Prostate Cancer Patient-derived Xenograft (MDA PCa PDX) Series
Source: PubMed Central journal article supplement — Clin Cancer Res. 2024 Mar 15;30(10):2272–85. doi: 10.1158/1078-0432.CCR-23-2438 (PMC11094415; doi:10.1158/1078-0432.ccr-23-2438), 2024-03-15
Supplement: ccr-23-2438_supplementary_table_s1_suppts1.pdf [file ccr-23-2438_supplementary_table_s1_suppts1.pdf]

**Table S1. Clinical and morphological features of 44 MDA PCa PDXs**

| Patient ID          | PDX name is "MDA PCa + the alphanumeric string below" | Race     | Treatment Status | Last Treatment Category | Prior Treatments   | Primary, Bone or Other Metastatic Site | Tumor Site    | Morphology of PDX               | **Growth rate (days) | Publications                                                                                                                                                                                                                                                                                                                                   |
|---------------------|-------------------------------------------------------|----------|------------------|-------------------------|--------------------|----------------------------------------|---------------|---------------------------------|----------------------|------------------------------------------------------------------------------------------------------------------------------------------------------------------------------------------------------------------------------------------------------------------------------------------------------------------------------------------------|
| MDA PCa Pat-117     | 117-9                                                 | Hispanic | mCRPC            | Chemotherapy            | 1st Generation ADT | Primary                                | Prostate      | Adenocarcinoma                  | 79                   | PMID: 22156612; 22245216; 24847116; 22363599; 30073676; 29138344; 26890396; 36461624; 35805010; 32576626                                                                                                                                                                                                                                       |
| MDA PCa Pat-118     | 118b                                                  | White    | mCRPC            | Chemotherapy            | 1st Generation ADT | Bone                                   | Bone          | Adenocarcinoma                  | 32                   | PMID: 25527621; 22457212; 22134886; 21670081; 21343372; 20564322; 25832466; 25762070; 25186177; 24779589; 22457212; 22298898; 21575865; 18618013; 27791181; 26096936; 26096936; 26272062; 26599623; 26530902; 30682644; 30555629; 30073676; 29887238; 29769196; 29138344; 26890396; 26792867; 28586644; 26272062; 35805010; 32576626; 33753455 |
| MDA PCa Pat-133     | 133-4                                                 | White    | mCRPC            | Chemotherapy            | 1st Generation ADT | Bone                                   | Bone          | Adenocarcinoma                  | 52                   | PMID: 23300537; 21670081; 26800435; 24847116; 21575865; 28228262; 28536297; 30287808; 27748439; 30555629; 30073676; 29138344; 29748904; 35805010; 32576626                                                                                                                                                                                     |
| MDA PCa Pat-144     | 144-13                                                | White    | mCRPC            | Chemotherapy            | 1st Generation ADT | Primary                                | Prostate      | Neuroendocrine Carcinoma        | 38                   | PMID: 21456067; 24847116; 22156612; 26272062; 30287808; 30555629; 30073676; 29138344; 26890396; 29748904; 26272062; 35805010; 32576626; 35385726                                                                                                                                                                                               |
| MDA PCa Pat-144     | 144-4                                                 | White    | mCRPC            | Chemotherapy            | 1st Generation ADT | Primary                                | *Bladder      | Neuroendocrine Carcinoma        | 33                   | PMID: 32576626; 35385726                                                                                                                                                                                                                                                                                                                       |
| MDA PCa Pat-146     | 146-10                                                | White    | mCRPC            | Chemotherapy            | 1st Generation ADT | Primary                                | *Bladder      | Neuroendocrine Carcinoma        | 76                   | PMID: 24847116; 22156612; 30073676; 29138344; 26890396; 26792867; 35805010; 32576626; 34738088                                                                                                                                                                                                                                                 |
| MDA PCa Pat-146     | 146-12                                                | White    | mCRPC            | Chemotherapy            | 1st Generation ADT | Primary                                | *Bladder      | Adenocarcinoma                  | 88                   | PMID: 34937944; 32576626; 34738088                                                                                                                                                                                                                                                                                                             |
| MDA PCa Pat-150     | 150-7                                                 | White    | mCRPC            | Chemotherapy            | 1st Generation ADT | Bone                                   | Bone          | Neuroendocrine Carcinoma        | 45                   | PMID: 30073676; 29138344; 32576626                                                                                                                                                                                                                                                                                                             |
| MDA PCa Pat-152     | 152-1                                                 | White    | mCRPC            | 1st Generation ADT      | 1st Generation ADT | Other Metastatic Site                  | Brain         | *Adenocarcinoma                 | 40                   | PMID: 30555629; 29138344; 35805010; 32576626                                                                                                                                                                                                                                                                                                   |
| MDA PCa Pat-153     | 153-7                                                 | White    | mCRPC            | 1st Generation ADT      | 1st Generation ADT | Other Metastatic Site                  | Thyroid       | Adenocarcinoma                  | 88                   | PMID: 24847116; 22133722; 30073676; 29138344; 32576626                                                                                                                                                                                                                                                                                         |
| MDA PCa Pat-155     | 155-2                                                 | White    | mCRPC            | Chemotherapy            | 1st Generation ADT | Primary                                | *Bladder      | Neuroendocrine Carcinoma        | 64                   | PMID: 24847116; 22156612; 29138344; 26890396; 29748904; 35805010; 32576626; 35385726                                                                                                                                                                                                                                                           |
| MDA PCa Pat-163     | 163-A                                                 | White    | mCRPC            | 1st Generation ADT      | 1st Generation ADT | Primary                                | Prostate      | Adenocarcinoma                  | 55                   | PMID: 35385726; 35805010                                                                                                                                                                                                                                                                                                                       |
| MDA PCa Pat-173     | 173-2                                                 | White    | Naive            | Naive                   |                    | Primary                                | Prostate      | Adenocarcinoma                  | 83                   | PMID: 24847116; 22156612; 30073676; 30555629; 30073676; 35805010; 32576626; 37018402                                                                                                                                                                                                                                                           |
| MDA PCa Pat-174     | 174-6                                                 | Black    | mCRPC            | Chemotherapy            | 1st Generation ADT | Primary                                | Prostate      | Adenocarcinoma                  | 78                   |                                                                                                                                                                                                                                                                                                                                                |
| MDA PCa Pat-175     | 175-6                                                 | Hispanic | mCRPC            | Chemotherapy            | 1st Generation ADT | Other Metastatic Site                  | Testis        | Adenocarcinoma                  | 66                   | PMID: 30073676; 32576626; 37018402                                                                                                                                                                                                                                                                                                             |
| MDA PCa Pat-177     | 177-8                                                 | White    | mCRPC            | 1st Generation ADT      | 1st Generation ADT | Primary                                | Prostate      | Poorly Differentiated Carcinoma | 46                   | PMID: 30073676; 35805010; 32576626                                                                                                                                                                                                                                                                                                             |
| MDA PCa Pat-178     | 178-11                                                | White    | NADT             | 1st Generation ADT      | 1st Generation ADT | Primary                                | Prostate      | Adenocarcinoma                  | 94                   | PMID: 30073676; 35805010; 32576626                                                                                                                                                                                                                                                                                                             |
| MDA PCa Pat-180     | 180-30                                                | White    | mCRPC            | Chemotherapy            | 1st Generation ADT | Primary                                | Prostate      | Adenocarcinoma                  | 47                   | PMID: 22245216; 24847116; 22156612; 30073676; 29769196; 29748904; 26272062; 35805010; 32576626                                                                                                                                                                                                                                                 |
| MDA PCa Pat-183/203 | 183-A                                                 | White    | Naive            | Naive                   |                    | Bone                                   | Bone          | Adenocarcinoma                  | 67                   | PMID: 24779589; 22133722; 30682644; 30555629; 30073676; 29887238; 29138344; 28166537; 35805010; 32576626; 34584218                                                                                                                                                                                                                             |
| MDA PCa Pat-200     | 200-1                                                 | White    | mCRPC            | 1st Generation ADT      | 1st Generation ADT | Bone                                   | Bone          | Adenocarcinoma                  | 44                   |                                                                                                                                                                                                                                                                                                                                                |
| MDA PCa Pat-183/203 | 203-A                                                 | White    | mCRPC            | 1st Generation ADT      | 1st Generation ADT | Bone                                   | Bone          | Adenocarcinoma                  | 93                   | PMID: 30073676; 35805010; 34584218                                                                                                                                                                                                                                                                                                             |
| MDA PCa Pat-250     | 250-15                                                | White    | NADT             | 1st Generation ADT      | 1st Generation ADT | Other Metastatic Site                  | Adrenal Gland | *Adenocarcinoma                 | 86                   | PMID: 36100698; 36100698                                                                                                                                                                                                                                                                                                                       |
| MDA PCa Pat-265     | 265-8                                                 | White    | mCRPC            | Chemotherapy            | 2nd Generation ADT | Primary                                | Prostate      | Adenocarcinoma                  | 40                   | PMID: 30073676; 35805010                                                                                                                                                                                                                                                                                                                       |
| MDA PCa Pat-266     | 266-A                                                 | White    | mCRPC            | Chemotherapy            | 1st Generation ADT | Other Metastatic Site                  | Serous Cavity | Adenocarcinoma                  | 54                   | PMID: 30073676; 35805010                                                                                                                                                                                                                                                                                                                       |
| MDA PCa Pat-270     | 270-A                                                 | White    | NADT             | 1st Generation ADT      | 1st Generation ADT | Bone                                   | Bone          | Adenocarcinoma                  | 80                   | PMID: 30073676; 35805010                                                                                                                                                                                                                                                                                                                       |
| MDA PCa Pat-273     | 273-A                                                 | White    | mCRPC            | 2nd Generation ADT      | 2nd Generation ADT | Other Metastatic Site                  | Lymph Node    | Neuroendocrine Carcinoma        | 63                   | PMID: 30073676; 35805010                                                                                                                                                                                                                                                                                                                       |
| MDA PCa Pat-274     | 274-2                                                 | White    | mCRPC            | Chemotherapy            | 2nd Generation ADT | Bone                                   | Bone          | Adenocarcinoma                  | 47                   |                                                                                                                                                                                                                                                                                                                                                |
| MDA PCa Pat-277     | 277-6                                                 | White    | mCRPC            | 2nd Generation ADT      | 2nd Generation ADT | Other Metastatic Site                  | Lymph Node    | Neuroendocrine Carcinoma        | 35                   | PMID: 30555629                                                                                                                                                                                                                                                                                                                                 |
| MDA PCa Pat-280/306 | 280-9                                                 | White    | Naive            | Naive                   |                    | Other Metastatic Site                  | Lymph Node    | Adenocarcinoma                  | 35                   |                                                                                                                                                                                                                                                                                                                                                |
| MDA PCa Pat-285     | 285-3                                                 | White    | mCRPC            | 2nd Generation ADT      | 2nd Generation ADT | Primary                                | *Bladder      | Adenocarcinoma                  | 124                  |                                                                                                                                                                                                                                                                                                                                                |
| MDA PCa Pat-280/306 | 306-14                                                | White    | mCRPC            | 1st Generation ADT      | 1st Generation ADT | Primary                                | Prostate      | Adenocarcinoma                  | 97                   |                                                                                                                                                                                                                                                                                                                                                |
| MDA PCa Pat-312     | 312-7                                                 | White    | mCRPC            | Chemotherapy            | 1st Generation ADT | Primary                                | Prostate      | Neuroendocrine Carcinoma        | 58                   | PMID: 35805010                                                                                                                                                                                                                                                                                                                                 |
| MDA PCa Pat-315     | 315-8                                                 | White    | mCRPC            | 2nd Generation ADT      | 2nd Generation ADT | Primary                                | Prostate      | Poorly Differentiated Carcinoma | 75                   |                                                                                                                                                                                                                                                                                                                                                |
| MDA PCa Pat-316     | 316-1                                                 | White    | mCRPC            | 2nd Generation ADT      | 2nd Generation ADT | Bone                                   | Bone          | Adenocarcinoma                  | 55                   |                                                                                                                                                                                                                                                                                                                                                |
| MDA PCa Pat-316     | 316-2                                                 | White    | mCRPC            | 2nd Generation ADT      | 2nd Generation ADT | Other Metastatic Site                  | CTC           | Adenocarcinoma                  | 43                   |                                                                                                                                                                                                                                                                                                                                                |
| MDA PCa Pat-320     | 320-1                                                 | White    | mCRPC            | 1st Generation ADT      | 1st Generation ADT | Other Metastatic Site                  | CTC           | Adenocarcinoma                  | 48                   |                                                                                                                                                                                                                                                                                                                                                |
| MDA PCa Pat-322     | 322-2                                                 | Black    | NADT             | 1st Generation ADT      | 1st Generation ADT | Primary                                | Prostate      | Adenocarcinoma                  | 101                  |                                                                                                                                                                                                                                                                                                                                                |
| MDA PCa Pat-328     | 327-2                                                 | White    | mCRPC            | Chemotherapy            | 2nd Generation ADT | Other Metastatic Site                  | CTC           | Adenocarcinoma                  | 54                   |                                                                                                                                                                                                                                                                                                                                                |
| MDA PCa Pat-328     | 328-5                                                 | White    | CRPC             | 1st Generation ADT      | 1st Generation ADT | Primary                                | *Bladder      | Neuroendocrine Carcinoma        | 55                   | PMID: 35805010                                                                                                                                                                                                                                                                                                                                 |
| MDA PCa Pat-337     | 337-A                                                 | Black    | mCRPC            | 1st Generation ADT      | 1st Generation ADT | Other Metastatic Site                  | Liver         | Neuroendocrine Carcinoma        | 51                   | PMID: 34636746; 36461624                                                                                                                                                                                                                                                                                                                       |
| MDA PCa Pat-342/355 | 342-B                                                 | White    | mCRPC            | Chemotherapy            | 1st Generation ADT | Primary                                | Prostate      | Sarcomatoid Carcinoma           | 32                   |                                                                                                                                                                                                                                                                                                                                                |
| MDA PCa Pat-352     | 352-8                                                 | Black    | mCRPC            | 2nd Generation ADT      | 2nd Generation ADT | Other Metastatic Site                  | Lymph Node    | Adenocarcinoma                  | 50                   |                                                                                                                                                                                                                                                                                                                                                |
| MDA PCa Pat-342/355 | 355-9                                                 | White    | mCRPC            | Chemotherapy            | 2nd Generation ADT | Primary                                | *Bladder      | Sarcomatoid Carcinoma           | 25                   |                                                                                                                                                                                                                                                                                                                                                |
| MDA PCa Pat-377     | 377-1                                                 | Black    | mCRPC            | Chemotherapy            | 2nd Generation ADT | Other Metastatic Site                  | Brain         | Adenocarcinoma                  | 60                   |                                                                                                                                                                                                                                                                                                                                                |

PDX, patient-derived xenograft; mCRPC, metastatic castration-resistant prostate cancer; ADT, androgen deprivation therapy; NADT, On Neoadjuvant androgen deprivation therapy; CTC, circulating tumor cells; \*, Direct extension of prostate cancer; †, these PDX have ductal features

PDXs with same Patient ID are derived from different areas of the same tumor at the same time. All morphologies reflect the patient sample of origin (PMID:32576626)

\*\* Growth rate is calculated based on the number of days that it takes a 0.5 cm<sup>3</sup> piece of PDX tissue implanted subcutaneously to develop into a tumor that is 1.5 cm in its largest diameter. This data is not listed for most archived models as they can no longer be grown.
