# Supplementary material for: Integrative Molecular Analyses of the MD Anderson Prostate Cancer Patient-derived Xenograft (MDA PCa PDX) Series
Source: PubMed Central journal article supplement — Clin Cancer Res. 2024 Mar 15;30(10):2272–85. doi: 10.1158/1078-0432.CCR-23-2438 (PMC11094415; doi:10.1158/1078-0432.ccr-23-2438), 2024-03-15
Supplement: ccr-23-2438_supplementary_table_s2_suppts2.pdf [file ccr-23-2438_supplementary_table_s2_suppts2.pdf]

|        |         |          |         |         |         |
|--------|---------|----------|---------|---------|---------|
| ABL1   | CD79A   | EZH2     | KMT2C   | PDCD1   | SMARCA2 |
| ABL2   | CD79B   | FADD     | KMT2D   | PDGFRA  | SMARCA4 |
| ACVR1B | CDC27   | FANCA    | KRAS    | PDGFRB  | SMARCB1 |
| ACVR2A | CDC73   | FANCD2   | LRP1B   | PHF6    | SMARCD1 |
| AJUBA  | CDH1    | FBXW7    | MAP2K1  | PIK3CA  | SMC1A   |
| AKT1   | CDK12   | FGFR1    | MAP2K2  | PIK3CG  | SMC3    |
| AKT2   | CDK4    | FGFR2    | MAP2K4  | PIK3R1  | SMO     |
| AKT3   | CDK6    | FGFR3    | MAP3K1  | PLCG1   | SOCS1   |
| AKTIP  | CDKN1B  | FGFR4    | MAP3K13 | PMS2    | SOS1    |
| ALK    | CDKN2A  | FH       | MAP3K4  | POLE    | SOX9    |
| AMER1  | CDKN2C  | FLT1     | MAPK1   | PPM1D   | SPEN    |
| APC    | CEBPA   | FLT3     | MCL1    | PPP1R3A | SPOP    |
| AR     | CHEK1   | FLT4     | MDM2    | PPP2R1A | SRC     |
| ARAF   | CHEK2   | FOXA1    | MED12   | PRDM1   | SRSF2   |
| ARID1A | CIC     | FOXL2    | MEN1    | PREX2   | STAG2   |
| ARID1B | COL2A1  | FTO      | MET     | PRG4    | STAT3   |
| ARID2  | CREBBP  | GABRA6   | MITF    | PTCH1   | STK11   |
| ASXL1  | CSF1R   | GATA1    | MLH1    | PTEN    | STK19   |
| ATM    | CTCF    | GATA2    | MPL     | PTK2    | SUFU    |
| ATR    | CTLA4   | GATA3    | MSH2    | PTPN11  | SYK     |
| ATRX   | CTNNB1  | GNA11    | MSH6    | PTPRB   | TBC1D4  |
| AURKA  | CYLD    | GNAQ     | MST1    | RAC1    | TBX3    |
| AURKB  | CYP2C19 | GNAS     | MST1R   | RAD51   | TERTp   |
| AXIN1  | DAXX    | GSK3B    | MTOR    | RAD51C  | TET2    |
| AXIN2  | DDR2    | H3F3A    | MUTYH   | RAF1    | TGFB1   |
| AXL    | DDX3X   | H3F3B    | MYD88   | RARA    | TGFBR1  |
| B2M    | DICER1  | HIST1H3B | NBN     | RB1     | TGFBR2  |
| BAP1   | DNMT3A  | HLA-A    | NCOR1   | RET     | TNF     |
| BCL11A | EGFR    | HNF1A    | NF1     | RICTOR  | TNFAIP3 |
| BCL2   | ELF3    | HRAS     | NF2     | RNF43   | TOP1    |
| BCOR   | EP300   | HSP90AB1 | NFE2L2  | ROS1    | TOP2A   |
| BIRC2  | EPCAM   | IDH1     | NKX2-1  | RPS6KB1 | TP53    |
| BRAF   | EPHA2   | IDH2     | NOTCH1  | RPTOR   | TSC1    |
| BRCA1  | EPHA3   | IGF1R    | NOTCH2  | RUNX1   | TSC2    |
| BRCA2  | EPHA5   | IL7R     | NOTCH3  | RUNX1T1 | TSHR    |
| BTK    | ERBB2   | JAK1     | NOTCH4  | SDHB    | U2AF1   |
| CARD11 | ERBB3   | JAK2     | NPM1    | SDHC    | VEGFA   |
| CASP8  | ERBB4   | JAK3     | NRAS    | SDHD    | VHL     |
| CBL    | ERCC2   | KDM5C    | NSD1    | SETBP1  | WHSC1L1 |
| CCND1  | ERCC3   | KDM6A    | NTRK1   | SETD2   | WT1     |
| CCND2  | ERCC4   | KDR      | NTRK3   | SF3B1   | XPO1    |
| CCND3  | ERCC5   | KEAP1    | PALB2   | SMAD2   | ZRSR2   |
| CCNE1  | ESR1    | KIT      | PAX5    | SMAD3   |         |
| CD274  | ETV1    | KMT2A    | PBRM1   | SMAD4   |         |
