# Supplementary material for: Integrative Molecular Analyses of the MD Anderson Prostate Cancer Patient-derived Xenograft (MDA PCa PDX) Series
Source: PubMed Central journal article supplement — Clin Cancer Res. 2024 Mar 15;30(10):2272–85. doi: 10.1158/1078-0432.CCR-23-2438 (PMC11094415; doi:10.1158/1078-0432.ccr-23-2438), 2024-03-15
Supplement: ccr-23-2438_supplementary_table_s3_suppts3.pdf [file ccr-23-2438_supplementary_table_s3_suppts3.pdf]

**Table S3.** Percentage of reads matching with mouse DNA

| MDA PCa PDX | Percent filtered |
|-------------|------------------|
| 117-9       | 1.64%            |
| 118b        | 24.85%           |
| 133-4       | 3.51%            |
| 144-13      | 2.18%            |
| 144-4       | 6.93%            |
| 146-10      | 1.17%            |
| 146-12      | 2.89%            |
| 150-7       | 2.79%            |
| 152-1       | 9.64%            |
| 153-7       | 36.84%           |
| 155-2       | 2.26%            |
| 163-A       | 5.70%            |
| 173-2       | 6.12%            |
| 174-6       | 6.10%            |
| 175-6       | 3.29%            |
| 177-B       | 4.77%            |
| 178-11      | 6.77%            |
| 180-30      | 6.06%            |
| 183-A       | 12.88%           |
| 200-1       | 7.04%            |
| 203-A       | 12.03%           |
| 250-15      | 11.19%           |
| 255-A       | 98.94%           |
| 265-8       | 3.28%            |
| 266-A       | 4.99%            |
| 270-A       | 4.17%            |
| 273-A       | 3%               |
| 274-2       | 4.07%            |
| 277-6       | 2.06%            |
| 280-9       | 25.71%           |
| 285-3       | 7.70%            |
| 306-14      | 7.56%            |
| 311-1       | 99.03%           |
| 312-7       | 2.64%            |
| 315-8       | 8.10%            |
| 316-1       | 5.04%            |
| 316-2       | 2.92%            |
| 320-1       | 5.78%            |
| 322-2       | 14.18%           |
| 327-2       | 6.64%            |
| 328-5       | 1.56%            |
| 337-A       | 1.92%            |
| 342-B       | 14.18%           |
| 352-8       | 5.83%            |
| 355-9       | 9.58%            |
| 377-1       | 3.46%            |

Samples that were excluded due to high mouse DNA content are in red
