# Supplementary material for: Integrative Molecular Analyses of the MD Anderson Prostate Cancer Patient-derived Xenograft (MDA PCa PDX) Series
Source: PubMed Central journal article supplement — Clin Cancer Res. 2024 Mar 15;30(10):2272–85. doi: 10.1158/1078-0432.CCR-23-2438 (PMC11094415; doi:10.1158/1078-0432.ccr-23-2438), 2024-03-15
Supplement: ccr-23-2438_supplementary_table_s4_suppts4.pdf [file ccr-23-2438_supplementary_table_s4_suppts4.pdf]

**Table S4. Fusions identified in MDA PCa PDX cohort**

| Gene.A  | Gene.B | PDX      | Data Source | Detection meth. | Chr.A | Pos.A     | Chr.B | Pos.B     | dir.A.B |   |
|---------|--------|----------|-------------|-----------------|-------|-----------|-------|-----------|---------|---|
| TMPRSS2 | ETV4   | 175-6    | WGS         | bs.dl.lp        | chr21 | 42867729  | chr17 | 41632042  | -+      |   |
|         |        |          | RNAseq      | df.fm.mp.th     | chr21 | 42867729  | chr17 | 41632042  | -+      |   |
|         |        | 180-30   | WGS         | bs.dl.lp        | chr21 | 42866568  | chr17 | 41650089  | -+      |   |
|         |        |          | RNAseq      | df.fm.mp.th     | chr21 | 42866568  | chr17 | 41650088  | -+      |   |
| TMPRSS2 | ERG    | 173-2    | WGS         | bs.lp           | chr21 | 42872537  | chr21 | 39863885  | -+      |   |
|         |        |          | RNAseq      | df.fm.mp        | chr21 | 42879877  | chr21 | 39817544  | -+      |   |
|         |        | 183-A    | WGS         | bs.lp           | chr21 | 42860881  | chr21 | 39871051  | -+      |   |
|         |        |          | RNAseq      | df.fm.mp        | chr21 | 42861434  | chr21 | 39817544  | -+      |   |
|         |        | 203-A    | WGS         | bs.lp           | chr21 | 42860880  | chr21 | 39871050  | -+      |   |
|         |        |          | RNAseq      | df.fm.mp        | chr21 | 42861434  | chr21 | 39817544  | -+      |   |
|         |        | 133-4    | WGS         | bs.lp           | chr21 | 42872545  | chr21 | 39860834  | -+      |   |
|         |        |          | RNAseq      | df.fm.mp        | chr21 | 42879877  | chr21 | 39817544  | -+      |   |
|         |        | 285-3    | WGS         | bs.lp           | chr21 | 42875598  | chr21 | 39900360  | -+      |   |
|         |        |          | RNAseq      | df.fm.mp        | chr21 | 42880008  | chr21 | 39817544  | -+      |   |
|         |        | 306-14   | WGS         | bs.lp           | chr21 | 42859305  | chr21 | 39871943  | -+      |   |
|         |        |          | RNAseq      | df.fm.mp        | chr21 | 42860321  | chr21 | 39775631  | -+      |   |
|         |        | 152-1    | WGS         | bs.lp           | chr21 | 42874174  | chr21 | 39861279  | -+      |   |
|         |        |          | RNAseq      | df.fm.mp        | chr21 | 42879877  | chr21 | 39817544  | -+      |   |
|         |        | 150-7    | WGS         | bs.lp           | chr21 | 42873453  | chr21 | 39862825  | -+      |   |
|         |        |          | RNAseq      | df.mp           | chr21 | 42848504  | chr21 | 39865501  | --      |   |
|         |        | 144-4    | WGS         | bs.lp           | chr21 | 42872479  | chr21 | 39884147  | -+      |   |
|         |        |          | RNAseq      | fm              | chr21 | 42879877  | chr21 | 39817544  | -+      |   |
|         |        | 144-13   | WGS         | bs.lp           | chr21 | 42872479  | chr21 | 39884147  | --      |   |
|         |        |          | \           | \               | \     | \         | \     | \         | \       | * |
| 320-1   | WGS    | bs.lp    | chr21       | 42867291        | chr21 | 39821458  | -+    |           |         |   |
|         | RNAseq | df.fm.mp | chr21       | 42870046        | chr21 | 39817544  | -+    |           |         |   |
| 153-7   | WGS    | bs.lp    | chr21       | 42873029        | chr21 | 39859982  | -+    |           |         |   |
|         | RNAseq | df.fm.mp | chr21       | 42879877        | chr21 | 39817544  | -+    |           |         |   |
| 163-A   | WGS    | bs.lp    | chr21       | 42870627        | chr21 | 39974760  | -+    |           |         |   |
|         | RNAseq | df.fm.mp | chr21       | 42879877        | chr21 | 39956869  | -+    |           |         |   |
| FOXA1   | ETV1   | 250-15   | WGS         | dl              | chr14 | 38060104  | chr7  | 13973676  | --      |   |
|         |        |          | RNAseq      | df.mp           | chr14 | 38060113  | chr7  | 13973666  | --      |   |
| ETV1    | FOXA1  | 250-15   | WGS         | bs.lp           | chr7  | 13973676  | chr14 | 38060114  | --      |   |
|         |        |          | RNAseq      | th              | chr7  | 13974515  | chr14 | 38060606  | --      |   |
| ACSL3   | ETV1   | 177-B    | WGS         | bs.dl.lp        | chr2  | 223750008 | chr7  | 13975069  | ++      |   |
|         |        |          | RNAseq      | df.fm.mp.th     | chr2  | 223725976 | chr7  | 13971374  | ++      |   |
| ETV1    | ACSL3  | 177-B    | WGS         | bs.dl           | chr7  | 13975168  | chr2  | 223750078 | --      |   |
|         |        |          | RNAseq      | fm.mp           | chr8  | 13975333  | chr3  | 223752548 | --      |   |
| SLC45A3 | ELK4   | 117-9    | WGS         |                 |       |           |       |           |         |   |
|         |        |          | RNAseq      | df              | chr1  | 205630989 | chr1  | 205593019 | -+      |   |
|         |        | 146-12   | WGS         |                 |       |           |       |           |         |   |
|         |        |          | RNAseq      | df              | chr1  | 205630989 | chr1  | 205593019 | -+      |   |
|         |        | 153-7    | WGS         |                 |       |           |       |           |         |   |
|         |        |          | RNAseq      | df              | chr1  | 205628617 | chr1  | 205593019 | -+      |   |
|         |        | 174-6    | WGS         |                 |       |           |       |           |         |   |
|         |        |          | RNAseq      | df              | chr1  | 205628617 | chr1  | 205593019 | -+      |   |
|         |        | 175-6    | WGS         |                 |       |           |       |           |         |   |
|         |        |          | RNAseq      | df              | chr1  | 205630989 | chr1  | 205593019 | -+      |   |
|         |        | 178-11   | WGS         |                 |       |           |       |           |         |   |
|         |        |          | RNAseq      | df              | chr1  | 205630989 | chr1  | 205593019 | -+      |   |
|         |        | 183-A    | WGS         |                 |       |           |       |           |         |   |
|         |        |          | RNAseq      | df              | chr1  | 205628617 | chr1  | 205593019 | -+      |   |
|         |        | 200-1    | WGS         |                 |       |           |       |           |         |   |
|         |        |          | RNAseq      | df              | chr1  | 205630989 | chr1  | 205593019 | -+      |   |
|         |        | 203-A    | WGS         |                 |       |           |       |           |         |   |
|         |        |          | RNAseq      | df              | chr1  | 205628617 | chr1  | 205593019 | -+      |   |
| 306-14  | WGS    |          |             |                 |       |           |       |           |         |   |
|         | RNAseq | df       | chr1        | 205628506       | chr1  | 205593072 | -+    |           |         |   |
| 250-15  | WGS    |          |             |                 |       |           |       |           |         |   |
|         | RNAseq | df       | chr1        | 205628617       | chr1  | 205593019 | -+    |           |         |   |

\* Determined by presence of an interstitial loss between the genes in the copy number profile.
