# Supplementary material for: Integrative Molecular Analyses of the MD Anderson Prostate Cancer Patient-derived Xenograft (MDA PCa PDX) Series
Source: PubMed Central journal article supplement — Clin Cancer Res. 2024 Mar 15;30(10):2272–85. doi: 10.1158/1078-0432.CCR-23-2438 (PMC11094415; doi:10.1158/1078-0432.ccr-23-2438), 2024-03-15
Supplement: ccr-23-2438_supplementary_table_s5_suppts5.pdf [file ccr-23-2438_supplementary_table_s5_suppts5.pdf]

Table S5. Clinical, morphological and molecular features of MDA PCa PDXs pairs derived from the same patient

| Patient ID                                             | MDA PCa PDX number  | Collection Date | Treatment Status  | Last Treatment Category | Prior Treatments                               | Tumor Site                | Pathology Diagnosis | Oncogenic Mutations      | Structural Variations (CNVs/ fusions)                                                                                                                                                                                                                                                                      | IHC AR                                                                                                      | RNA expression (FPKM)                                                                 |            |               |              |             |             |             |
|--------------------------------------------------------|---------------------|-----------------|-------------------|-------------------------|------------------------------------------------|---------------------------|---------------------|--------------------------|------------------------------------------------------------------------------------------------------------------------------------------------------------------------------------------------------------------------------------------------------------------------------------------------------------|-------------------------------------------------------------------------------------------------------------|---------------------------------------------------------------------------------------|------------|---------------|--------------|-------------|-------------|-------------|
|                                                        |                     |                 |                   |                         |                                                |                           |                     |                          |                                                                                                                                                                                                                                                                                                            |                                                                                                             | AR: 0.13                                                                              | PTEN: 0.01 | RB1: 5.69     | KDM6A: 0.01  | /           | /           |             |
| PDXs derived from different areas of the same tumor    | MDA PCa Pat 144     | 144-13          | /                 | mCRPC                   | Chemotherapy                                   | 1st Generation ADT        | Prostate            | Neuroendocrine Carcinoma | TP53 R273C 0.99                                                                                                                                                                                                                                                                                            | PTEN DeepDel; *RB1 transcript portion loss; KDM6A DeepDel; *TMPRSS2-ERG fusion                              | 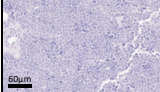   | AR: 0.13   | PTEN: 0.01    | RB1: 5.69    | KDM6A: 0.01 | /           | /           |
|                                                        |                     | 144-4           | /                 | mCRPC                   | Chemotherapy                                   | 1st Generation ADT        | *Bladder            | Neuroendocrine Carcinoma | TP53 R273C 1.00; NRAS Q61K AF 0.46                                                                                                                                                                                                                                                                         | PTEN DeepDel; *RB1 transcript portion loss; KDM6A DeepDel; TMPRSS2-ERG fusion                               |    | AR: 0.03   | PTEN: 0.05    | RB1: 2.38    | KDM6A: 0.01 | /           | /           |
|                                                        | MDA PCa Pat 146     | 146-10          | /                 | mCRPC                   | Chemotherapy                                   | 1st Generation ADT        | *Bladder            | Neuroendocrine Carcinoma | TP53 L330fs AF 0.98; RB1 R450fs AF 0.89; SPEN L3016fs AF 0.85                                                                                                                                                                                                                                              | *PTEN DeepDel; MAP3K1 DeepDel                                                                               |    | AR: 0.03   | PTEN: 2.67    | /            | /           | /           | /           |
|                                                        |                     | 146-12          | /                 | mCRPC                   | Chemotherapy                                   | 1st Generation ADT        | *Bladder            | Adenocarcinoma           | TP53 L198fs AF 0.98; RB1 R451fs AF 0.97; SPEN L3016fs AF 0.87                                                                                                                                                                                                                                              | PTEN DeepDel; MAP3K1 DeepDel; SLC45A3-ELK4 fusion                                                           |    | AR: 135.03 | PTEN: 6.12    | /            | /           | /           | /           |
|                                                        | MDA PCa Pat 316     | 316-1           | /                 | mCRPC                   | 2nd Generation ADT                             | /                         | Bone                | Adenocarcinoma           | PTEN L265fs AF 0.97; RNF43 R225fs AF 0.70; RNF43 R117fs*8 AF 0.64; SPOP F102Y AF 0.48; SPEN R2103fs AF 0.84; EPHA3 K200fs AF 0.86; NOTCH4 G1892fs AF 0.19; CHEK1 E239fs AF 0.65; PI3KCA R38C AF 0.51; DNMT3A G413fs AF 0.77; KMT2C K2797fs AF 0.32; PAX5 P321fs AF 0.73; KMT2D L434fs AF 0.77              | /                                                                                                           |    | AR: 67.62  | /             | /            | /           | /           | /           |
|                                                        |                     | 316-2           | /                 | mCRPC                   | 2nd Generation ADT                             | /                         | CTC                 | Adenocarcinoma           | AR T878A AF 0.98; PTEN L265fs AF 0.97; RNF43 G659fs AF 0.77; RNF43 R117fs AF 0.62; SPOP F102Y AF 0.49; SPEN R2103fs AF 0.82; EPHA3 K200fs AF 0.83; NOTCH4 G348fs AF 0.66; CHEK1 E239fs AF 0.62; PI3KCA R38C AF 0.48; DNMT3A G413fs AF 0.76; KMT2C K2797fs AF 0.46; TBX3 A71fs AF 0.79; MEN1 R521fs AF 0.76 | /                                                                                                           |    | AR: 38.31  | /             | /            | /           | /           | /           |
| PDXs derived from same patient at different timepoints | MDA PCa Pat-183/203 | 183-A           | Day 0             | Naive                   | /                                              | /                         | Bone                | Adenocarcinoma           | /                                                                                                                                                                                                                                                                                                          | PTEN DeepDel; TMRPSS2-ERG fusion; SLC45A3-ELK4 fusion                                                       |    | AR: 43.02  | KLK2: 1705.56 | RB1: 13.09   | PTEN: 0.09  | TP53: 12.69 | /           |
|                                                        |                     | 203-A           | 12.4 months later | mCRPC                   | Leuprolide                                     | /                         | Bone                | Adenocarcinoma           | /                                                                                                                                                                                                                                                                                                          | PTEN DeepDel; TMRPSS2-ERG fusion; SLC45A3-ELK4 fusion                                                       |    | AR: 74.63  | KLK2: 1346.95 | RB1: 16.98   | PTEN: 0.09  | TP53: 16.61 | /           |
|                                                        | MDA PCa Pat-280/306 | 280-9           | Day 0             | Naive                   | /                                              | /                         | Lymph Node          | Adenocarcinoma           | /                                                                                                                                                                                                                                                                                                          | /                                                                                                           |    | AR: 0.23   | KLK2: 2.51    | PTEN: 40.82  | BRCA2: 7.71 | ASXL2: 4.71 | ZFH3X: 0.87 |
|                                                        |                     | 306-14          | 12.4 months later | mCRPC                   | Degarelix + Leuprolide + Cabozantinib          | /                         | Prostate            | Adenocarcinoma           | /                                                                                                                                                                                                                                                                                                          | *PTEN transcript loss; BRCA2 DeepDel; ASXL2 DeepDel; ZFH3X DeepDel; TMRPSS2-ERG fusion; SLC45A3-ELK4 fusion |   | AR: 42.42  | KLK2: 916.92  | PTEN: 2.72   | BRCA2: 0.07 | ASXL2: 0.01 | ZFH3X: 0.00 |
|                                                        | MDA PCa Pat-342/355 | 342-B           | Day 0             | mCRPC                   | Cabozantinib                                   | Leuprolide + Bicalutamide | Prostate            | Sarcomatoid Carcinoma    | APC E1552Rfs*13 AF 0.98; PTEN V317Dfs*4 AF 0.96; RB1 M546* AF 0.98; TP53 R273C AF 1.00                                                                                                                                                                                                                     | *RB1 transcript loss; CDKN1B DeepDel; CD209 Amp; PRKDC Amp                                                  |  | AR: 1.14   | RB1: 1.08     | CDKN1B: 0.08 | /           | /           | /           |
|                                                        |                     | 355-9           | 4.8 months later  | mCRPC                   | Cabazitaxel + Carboplatin + Diethylstilbestrol | Abiraterone + Apalutamide | *Bladder            | Sarcomatoid Carcinoma    | APC E1552Rfs*13 AF 0.98; PTEN V317Dfs*4 AF 0.97; RB1 M546* AF 0.98; TP53 R273C AF 1.00                                                                                                                                                                                                                     | *RB1 transcript loss; CDKN1B DeepDel; CD209 Amp; PRKDC Amp                                                  |  | AR: 10.27  | RB1: 0.64     | CDKN1B: 0.08 | /           | /           | /           |

mCRPC, metastatic castration-resistant prostate cancer; AF, allele frequency; DeepDel, Deep Deletion. Note: only CNVs on driver genes are presented in the Table; \* transcript loss determined by manual inspection. TMRPSS2-ERG fusion in MDA PCa 144-13 was determined by identification of an interstitial loss between the genes in the copy number profile.
