# Supplementary material for: Integrative Molecular Analyses of the MD Anderson Prostate Cancer Patient-derived Xenograft (MDA PCa PDX) Series
Source: PubMed Central journal article supplement — Clin Cancer Res. 2024 Mar 15;30(10):2272–85. doi: 10.1158/1078-0432.CCR-23-2438 (PMC11094415; doi:10.1158/1078-0432.ccr-23-2438), 2024-03-15
Supplement: ccr-23-2438_supplementary_table_s6_suppts6.pdf [file ccr-23-2438_supplementary_table_s6_suppts6.pdf]

**Table S6.** STR Profiling of samples derived from the same patient

|               | Sample Name    | AMEL           | CSF1PO | D13S317 | D16S539 | D18S51 | D21S11  | D3S1358 | D5S818 | D7S820 | D8S1179  | FGA   | TH01  | TPOX | vWA   |       |
|---------------|----------------|----------------|--------|---------|---------|--------|---------|---------|--------|--------|----------|-------|-------|------|-------|-------|
| Heterogeneous | MDA PCa 144_13 | X,Y            | 11,12  | 11      | 11      | 12,14  | 29,31   | 15      | 11,13  | 9,12   | 11,12    | 20    | 6,9,3 | 8,10 | 14,20 |       |
|               | MDA PCa 144-4  | X,Y            | 11,12  | 11      | 11      | 12,14  | 29,31   | 15      | 11,13  | 9,12   | 11,12    | 20    | 6,9,3 | 8,10 | 14,20 |       |
|               | MDA PCa 146-10 | X,Y            | 11,12  | 11      | 12      | 17     | 29      | 14,15   | 11,12  | 9      | 8,13     | 22,25 | 6,9,3 | 8    | 14    |       |
|               | MDA PCa 146-12 | X,Y            | 11,12  | 11      | 12      | 17     | 29      | 14,15   | 11,12  | 9      | 8,13     | 22,25 | 6,9,3 | 8    | 14    |       |
|               | MDA PCa 316-1  | X              | 10,13  | 10,12   | 9,12    | 15,16  | 28      | 13,14   | 11     | 11,13  | 10,12    | 20,22 | 9,3   | 9,11 | 16,17 |       |
|               | MDA PCa 316-2  | X,Y            | 10,13  | 11      | 9,11    | 15,16  | 28,29   | 13,14   | 11     | 11,12  | 10,12    | 20,22 | 9,3   | 9,10 | 16,20 |       |
| Longitudinal  |                |                |        |         |         |        |         |         |        |        |          |       |       |      |       |       |
|               |                | MDA PCa 183-A  | X,Y    | 11      | 10,12   | 13     | 13,18   | 30,30.2 | 14,18  | 11,12  | 10,11    | 12,13 | 21    | 6,9  | 8     | 17,20 |
|               |                | MDA PCa 203-A  | X,Y    | 11      | 10,12   | 13     | 13,18   | 30,30.2 | 14,18  | 11,12  | 10,11    | 12,13 | 21    | 6,9  | 8     | 17,20 |
|               |                | MDA PCa 280-9  | X,Y    | 12      | 8,11    | 12,13  | 10,18   | 29,31.2 | 14,15  | 12     | 8,13     | 13,15 | 19    | 6,9  | 8,9   | 15,16 |
|               |                | MDA PCa 306-14 | X,Y    | 12      | 8,11    | 12     | 10,18   | 29,31.2 | 14,15  | 12     | 13       | 13,15 | 19    | 6,9  | 8,9   | 15,16 |
|               | MDA PCa 342-B  | X,Y            | 11     | 11      | 12      | 16     | 29,32.2 | 17      | 11     | 10,11  | 13       | 24,25 | 6,8   | 8,11 | 15,16 |       |
|               | MDA PCa 355-9  | X,Y            | 11     | 11      | 12,13   | 16     | 29,32.2 | 17      | 11     | 10,11  | 13,14,15 | 24,25 | 6,8   | 8,11 | 15,16 |       |
